# Supplementary material for: Impulsivity influences food intake in women with generalized anxiety disorder
Source: PubMed Central journal article supplement — Braz J Psychiatry. 2020 Feb 14;42(4):382–8. doi: 10.1590/1516-4446-2019-0556 (PMC7430399; doi:10.1590/1516-4446-2019-0556), 2020-02-14
Supplement: bjp-42-04-382-s001.pdf [file bjp-42-04-382-s001.pdf]

**Table S1** Confirmatory factor analysis of Barratt Impulsivity Scale (BIS-11)

|                 | 2 subdomains<br>International Society for Research on Impulsivity<br>( <a href="http://www.impulsivity.org">http://www.impulsivity.org</a> ) |               |       | 3 subdomains<br>(Malloy-Diniz et al., 2014) |               |       |
|-----------------|----------------------------------------------------------------------------------------------------------------------------------------------|---------------|-------|---------------------------------------------|---------------|-------|
|                 | Value                                                                                                                                        | [90%CI]       | p     | Value                                       | [90%CI]       | p     |
| Chi square (df) | 724.050 (349)                                                                                                                                |               | 0.000 | 814.453 (402)                               |               | 0.000 |
| CFI             | 0.328                                                                                                                                        |               |       | 0.321                                       |               |       |
| TLI             | 0.272                                                                                                                                        |               |       | 0.265                                       |               |       |
| NFI             | 0.227                                                                                                                                        |               |       | 0.219                                       |               |       |
| RMSEA           | 0.158                                                                                                                                        | (0.142-0.174) |       | 0.154                                       | (0.139-0.170) |       |

CFI = comparative fit index; TLI = Tucker-Lewis index; NFI = normed fit index; RMSEA = root mean square error of approximation.

**Table S2** Standardized regression weights (default model)

| 2 subdomains |                    | Estimate | 3 subdomains |              | Estimate |
|--------------|--------------------|----------|--------------|--------------|----------|
| Question 3   | Inhibitory Control | 0.042    | Question 28  | Attentional  | 0.691    |
| Question 2   | Inhibitory Control | 0.653    | Question 26  | Attentional  | 0.426    |
| Question 5   | Inhibitory Control | 0.454    | Question 24  | Attentional  | 0.063    |
| Question 6   | Inhibitory Control | 0.325    | Question 20_ | Attentional  | 0.649    |
| Question 8_  | Inhibitory Control | 0.429    | Question 11  | Attentional  | 0.519    |
| Question 9_  | Inhibitory Control | 0.608    | Question 9_  | Attentional  | 0.694    |
| Question 11  | Inhibitory Control | 0.505    | Question 5   | Attentional  | 0.489    |
| Question 14  | Inhibitory Control | 0.457    | Question 6   | Attentional  | 0.370    |
| Question 16  | Inhibitory Control | 0.218    | Question 30_ | Motor        | 0.455    |
| Question 17  | Inhibitory Control | 0.689    | Question 25  | Motor        | 0.296    |
| Question 18  | Inhibitory Control | 0.510    | Question 23  | Motor        | -0.270   |
| Question 19  | Inhibitory Control | 0.760    | Question 22  | Motor        | 0.209    |
| Question 20_ | Inhibitory Control | 0.626    | Question 21  | Motor        | -0.022   |
| Question 21  | Inhibitory Control | -0.017   | Question 19  | Motor        | 0.870    |
| Question 22  | Inhibitory Control | 0.197    | Question 17  | Motor        | 0.872    |
| Question 23  | Inhibitory Control | -0.281   | Question 16  | Motor        | 0.148    |
| Question 24  | Inhibitory Control | 0.030    | Question 4   | Motor        | 0.139    |
| Question 25  | Inhibitory Control | 0.253    | Question 3   | Motor        | 0.120    |
| Question 26  | Inhibitory Control | 0.309    | Question 2   | Motor        | 0.648    |
| Question 28  | Inhibitory Control | 0.558    | Question 1_  | Non-planning | 0.702    |
| Question 1_  | Non-planning       | 0.734    | Question 7_  | Non-planning | 0.338    |
| Question 4   | Non-planning       | 0.252    | Question 8_  | Non-planning | 0.592    |
| Question 7_  | Non-planning       | 0.384    | Question 10_ | Non-planning | 0.221    |
| Question 10_ | Non-planning       | 0.317    | Question 12_ | Non-planning | 0.841    |
| Question 12_ | Non-planning       | 0.746    | Question 13_ | Non-planning | 0.288    |
| Question 13_ | Non-planning       | 0.362    | Question 14  | Non-planning | 0.449    |
| Question 27  | Non-planning       | 0.341    | Question 15_ | Non-planning | 0.390    |
| Question 30_ | Non-planning       | 0.739    | Question 18  | Non-planning | 0.339    |
|              |                    |          | Question 27  | Non-planning | 0.227    |
|              |                    |          | Question 29  | Non-planning | 0.285    |

**Table S3** Multiple linear regression model analysis of the influence of impulsivity (BIS-11) and inhibitory control on nutrient intake

|                                                                   | <b>B</b> | <b>SE</b> | <b>t</b> | <b>p value</b> |
|-------------------------------------------------------------------|----------|-----------|----------|----------------|
| <b>Monounsaturated fat</b> (R = 0.341; adjusted R square = 0.050) |          |           |          |                |
| Constant                                                          | -5.327   | 20.270    | -0.263   | 0.794          |
| Age                                                               | -0.050   | 1.051     | -0.233   | 0.817          |
| Impulsivity (BIS)                                                 | 0.590    | 0.272     | 2.165    | 0.036          |
| Inhibitory control (no-go food)                                   | -1.464   | 0.914     | -1.603   | 0.117          |
| <b>Polyunsaturated fat</b> (R = 0.374; adjusted R square = 0.075) |          |           |          |                |
| Constant                                                          | -3.323   | 11.889    | -0.279   | 0.781          |
| Age                                                               | -0.107   | 0.126     | -0.848   | 0.402          |
| Impulsivity (BIS)                                                 | 0.359    | 0.160     | 2.251    | 0.030          |
| Inhibitory control (no-go food)                                   | -0.945   | 0.536     | -1.763   | 0.086          |

\* Regression model, significant at  $p < 0.05$ .

\*\* Independent variables, significant at  $p < 0.05$ .
